# Supplementary material for: Investigation of a flexible, room-temperature fiber-shaped NH3 sensor based on PANI–Au–SnO2
Source: Royal Society of Chemistry journal article supplement (doi:10.1039/d4ra06915c), 2024-01-01
Supplement: d4ra06915c1.pdf [file d4ra06915c1.pdf]

## Supporting Information

### Investigation of the room temperature flexible fiber shape $\text{NH}_3$ sensor based on PANI-Au-SnO<sub>2</sub> compound

Received 00th January 20xx,  
Accepted 00th January 20xx

DOI: 10.1039/x0xx00000x

Qiuning Wang,<sup>‡a</sup> Yuan Peng,<sup>‡a</sup> Bin Guo,<sup>b</sup> Jianhai Sun,<sup>c\*</sup> Yaxia Liu,<sup>d\*</sup> Yanjun Wang<sup>e</sup> and Hongyan Zhang<sup>a\*</sup>

- a. Beijing Key Laboratory of Clothing Materials R&D and Assessment, Beijing Engineering Research Center of Textile, Nanofiber, Beijing Institute of Fashion Technology, Beijing, 100029, P. R. China.
- b. Zhongshan Institute of Changchun University of Science and Technology, P. R. China.
- c. State Key Laboratory of Transducer Technology, Aerospace Information Research Institute, Chinese Academy of Sciences, Beijing, 100194, P. R. China.
- d. School of Fashion, Beijing Institute of Fashion.
- e. Beijing Institute of Fashion Technology School of Fashion Flat Knitting Machine Lab.

<sup>‡</sup>Both authors contribute equally to this work.

## Supporting Information

Fig S1:  $\text{NH}_3$  gas sensor detection scheme.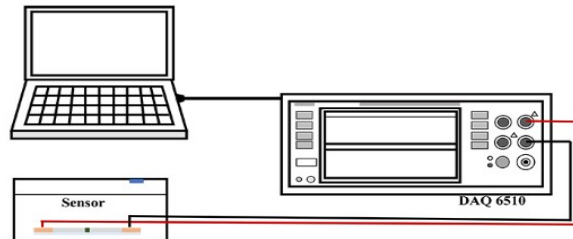Fig. S1  $\text{NH}_3$  gas sensor detection scheme.

Fig S2: Bending test apparatus.

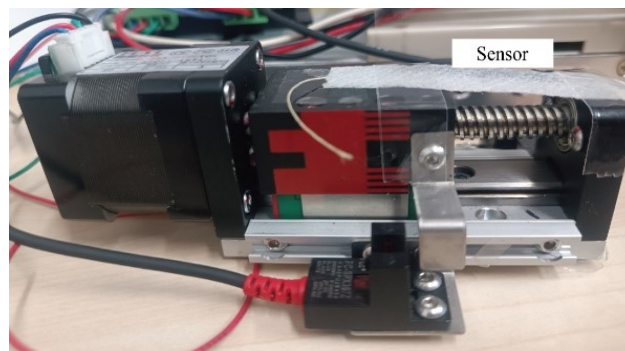

Fig. S2 Bending test apparatus.

Fig S3:  $\text{NH}_3$  sensitive material screening: (a-c) 10, 20, 50 nanometers of  $\text{SnO}_2$  made of  $\text{NH}_3$  sensitive material at 600 ppm responsivity.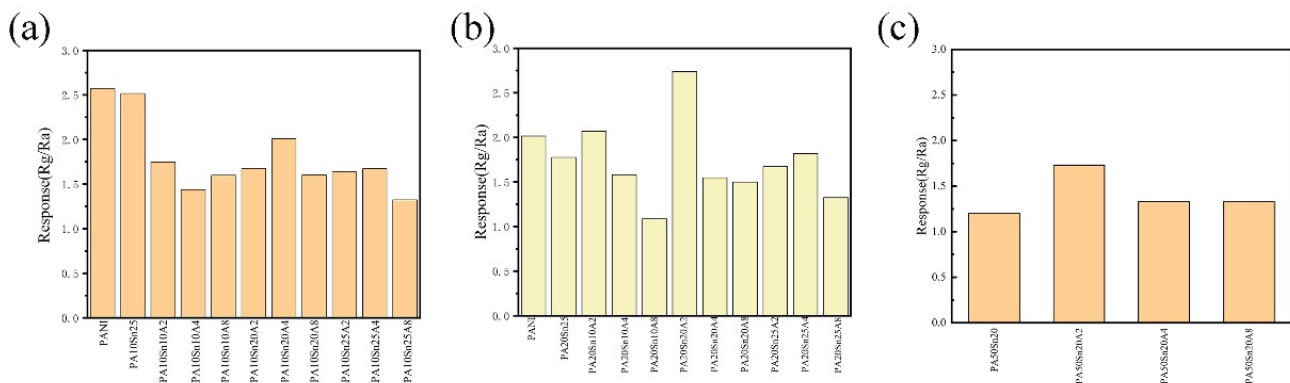Fig. S3  $\text{NH}_3$  sensitive material screening: (a-c) 10, 20, 50 nanometers of  $\text{SnO}_2$  made of  $\text{NH}_3$  sensitive material at 600 ppm responsivity.

**Fig S4: 20Sn20A2 and PA20Sn20A2 material element analysis.**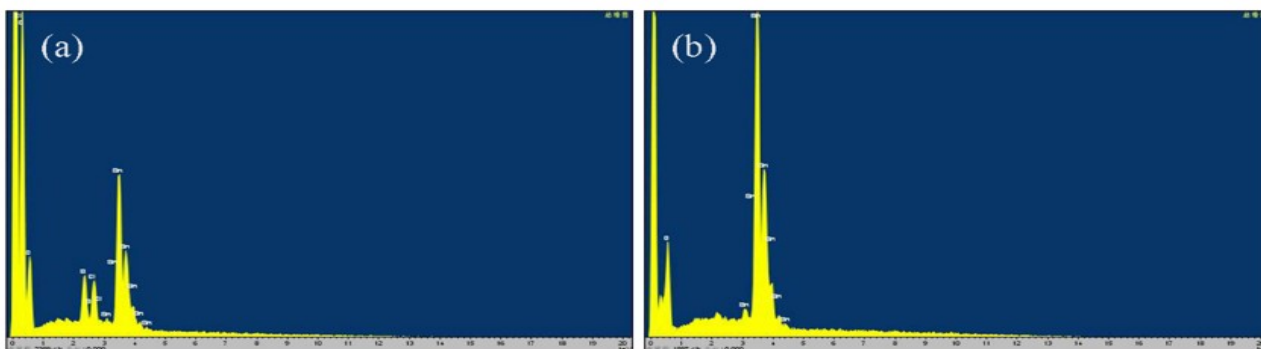

Fig. S 4 20Sn20A2 and PA20Sn20A2 material element analysis.

**Fig S5: XPS of PA20Sn10Au2.**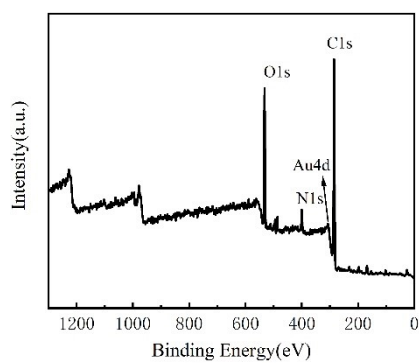

Fig. S5 XPS of PA20Sn10Au2.

**Fig S6: SEM of fiber shape NH<sub>3</sub> sensor.**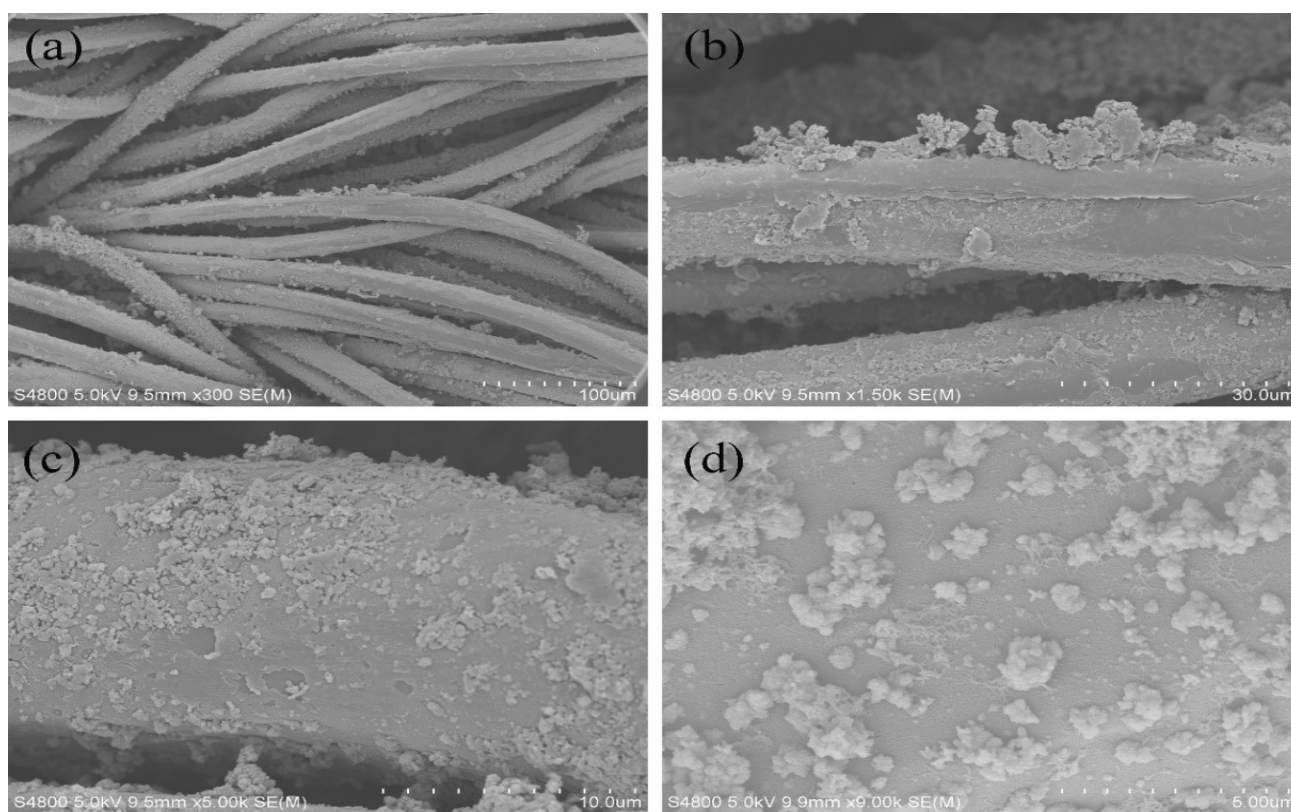Fig. S6 SEM of fiber shape NH<sub>3</sub> sensor.

**Fig S7: SEM of nylon woven fibers.**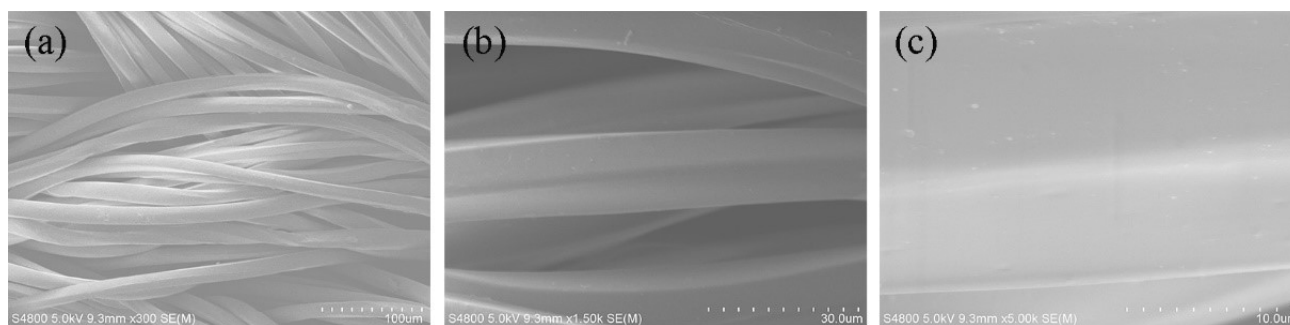

Fig. S7 SEM of nylon woven fibers.

**Fig S8: EDS analysis of fiber shape NH<sub>3</sub> sensor.**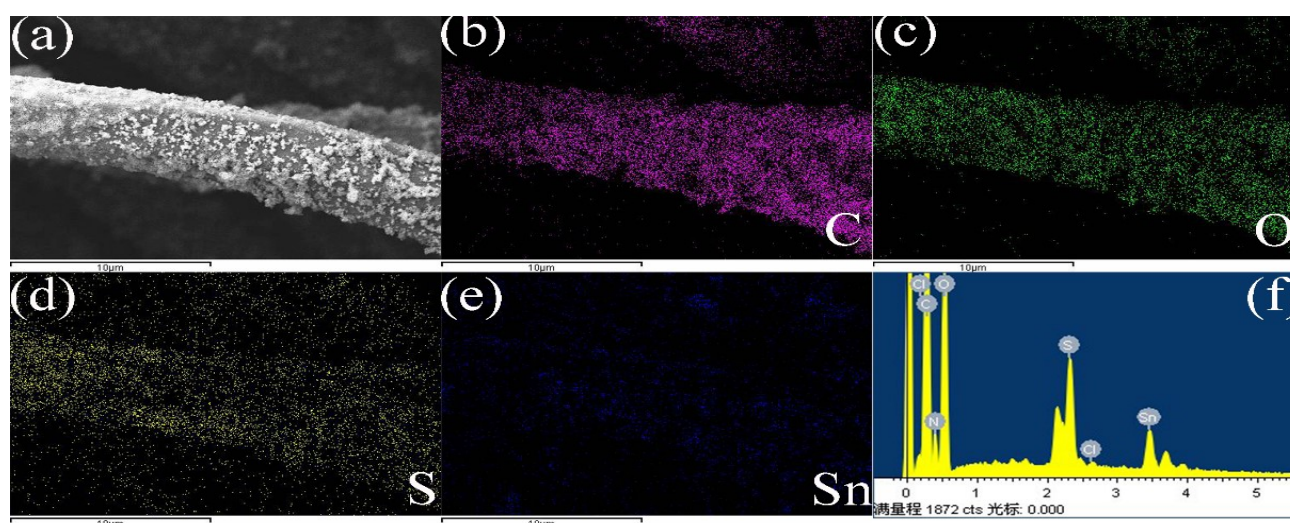Fig. S8 EDS analysis of fiber shape NH<sub>3</sub> sensor.**Fig S9: (a) Wearable NH<sub>3</sub> monitoring system. (b) The practical application of the hat. (c) Circuit diagram of the hat system.**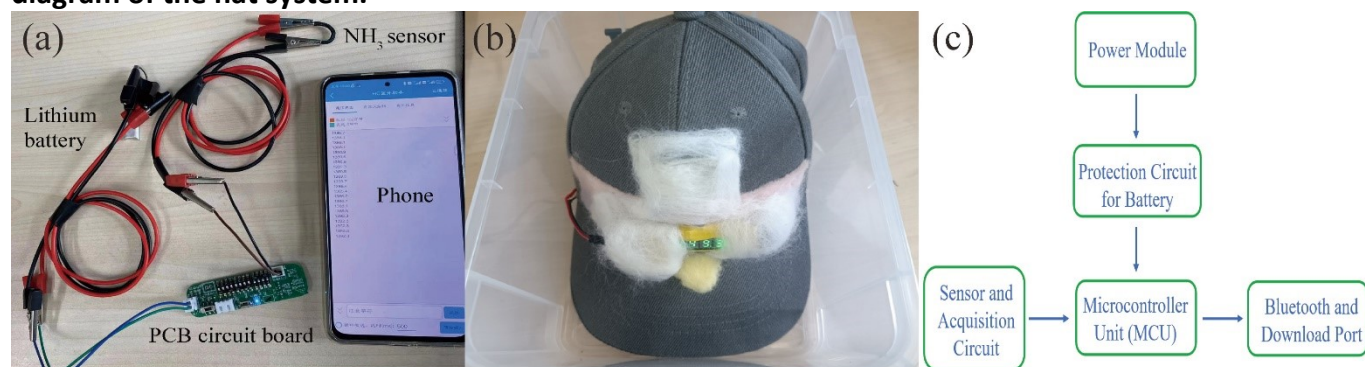Fig. S9 (a) Wearable NH<sub>3</sub> monitoring system. (b) The practical application of the hat. (c) Circuit diagram of the hat system.

**Table S1 Elemental energy spectrum analysis of 20Sn20A2.**

Table S 1 Elemental energy spectrum analysis of 20Sn20A2.

| Element | Concentration of element | Intensity correction | Percentage by weight | Percentage by weight Sigma | Atomic percent ratio |
|---------|--------------------------|----------------------|----------------------|----------------------------|----------------------|
| O K     | 2.92                     | 0.4260               | 30.08                | 0.89                       | 76.14                |
| Sn L    | 14.20                    | 0.8957               | 69.92                | 0.89                       | 23.86                |
| Total   |                          |                      | 100.00               |                            |                      |

**Table S2 The content of each element in PA20Sn10Au2.**Table S 2 The content  
PA20Sn10Au2

of each element in

| element type | element content |
|--------------|-----------------|
| C1s          | 74.196          |
| O1s          | 20.835          |
| N1s          | 4.91            |
| Au4d         | 0.059           |

**Table S3 The performance comparison between the sensor in this paper and the previous work.**

Table S 3 The performance comparison between the sensor in this paper and the previous work.

| Materials                         | Substrates                                 | Conc(ppm) | Temp.(°C) | Response/Recovery time (s) | The formula of response | Response | Ref       |
|-----------------------------------|--------------------------------------------|-----------|-----------|----------------------------|-------------------------|----------|-----------|
| PANI-Au-SnO <sub>2</sub>          | The nylon braided line                     | 20        | RT        | 93/168                     | $R_b/R_a$               | 1.68     | This work |
| NiO-CuO                           | Poly(para-phenyleneterephthalamide) fibers | 200       | RT        | 72.5/35                    | $\Delta R/R_a$          | 82%      | 1         |
| CNT-ZnO                           | commercially available nylon rope          | 500       | RT        | -                          | $R_b/R_a$               | 1.2      | 2         |
| MXene-rGO                         | MXene/rGO hybrid fibers                    | 100       | RT        | -                          | $\Delta R/R_a * 100\%$  | 7.21%    | 3         |
| PANI-polyethylene oxide (PEO)-ZnO | PANI/PEO nanofibers                        | 250       | RT        | 245/153                    | $\Delta R/R_a * 100$    | 60%      | 4         |
| PANI-WO <sub>3</sub>              | cotton thread                              | 100       | RT        | 122/165                    | $R_b/R_a$               | 2.5      | 5         |
| PANI                              | Yarn/PS                                    | 50        | RT        | /                          | $\Delta R/R_a$          | 57%      | 6         |

§ RT in the table is 25 °C.  $R_b$  is the resistance value of the sensor after stable contact with the target gas,  $R_a$  is the resistance value of the sensor in the air, and  $\Delta R$  is the absolute value of the difference between the above two values.

## References

- 1 Y. Zhou, J. Wang, X. Li, Flexible room-temperature gas sensor based on poly (para-phenylene terephthalamide) fibers substrate coupled with composite NiO@CuO sensing materials for ammonia detection, *Ceram. Int.*, 2020, 46(9), 13827-13834.
- 2 Z. Gao, Z. Lou, S. Chen, Fiber gas sensor-integrated smart face mask for room-temperature distinguishing of target gases, *Nano Res.*, 2018, 11, 511-519.
- 3 S. Lee, W. Eom, H. Shin, R B. Ambade, J H. Bang, H W. Kim, T H. Han, Room-temperature, highly durable Ti<sub>3</sub>C<sub>2</sub>T<sub>x</sub> MXene/graphene hybrid fibers for NH<sub>3</sub> gas sensing, *ACS Appl. Mater. Interfaces*, 2020, 12, 10434-10442.
- 4 G. Konuk Ege, Ö. Akay, H. Yüce, A chemosensitive-based ammonia gas sensor with PANI/PEO–ZnO nanofiber composites sensing layer, *Microelectron. Int.*, 2023, ahead-of-print(ahead-of-print). <https://doi.org/10.1108/MI-04-2023-0051>
- 5 M. He, L. Xie, G. Luo, Flexible fabric gas sensors based on PANI/WO<sub>3</sub> p–n heterojunction for high performance NH<sub>3</sub> detection at room temperature, *Sci. China Mater.*, 2020, 63, 2028–2039.
- 6 N. Indarit, YH. Kim, N. Petchsang, R. Jaisutti, Highly sensitive polyaniline-coated fiber gas sensors for real-time monitoring of ammonia gas, *RSC Adv.*, 2019, 9, 26773-26779.
